# Supplementary material
Source: MDPI journal article supplement (https://www.mdpi.com/2673-9976/19/1/11)
Supplement: s1 [file s1]

# Reference models for children and young people with Epidermolysis bullosa

## First case report on the protective factors and challenges for psycho-social maturation and resilience

Mar Salas-Llopart 1 and Lydia Giménez-Llort 1,2

1. Dept Psychiatry and Forensic Medicine and 2. Institut de Neurociències, Universitat Autònoma de Barcelona, Barcelona, Spain

UAB

Universitat Autònoma  
de Barcelona

### INTRODUCTION

- ❖ Epidermolysis bullosa (EB) is a chronic disease with multiple clinical presentations depending on the more than 30 subtypes, characterized by skin and tissues structural fragility resulting in lesions [1].
- ❖ The low prevalence contributes to the lack of knowledge of the disease by the general population and the health sector. The disorder's heterogeneity [2] adds challenges to describing psycho-social affectations [3,4].
- ❖ An inverse correlation between disease severity and quality of life in patients and their families has been described [5].
- ❖ Psycho-social aspects in people with more severe subtypes of EB and body dysmorphism refer to loss of self-esteem and coping skills, low self-control, intense fear, anxiety, depression, and social isolation [3-6].
- ❖ On the other hand, acute, chronic and procedural pain, common comorbidities in EB [7-9] and anxiety can negatively affect cognition and interfere with academic and professional achievements (see Sciforum-063422).
- ❖ The need of reference models for children and young people with EB is specially important with regards to identifying protective factors and challenges for their psycho-social maturation and resilience, the aim of the present work.

Photo: By Svdmolen - Own work, CC BY-SA 3.0  
<https://commons.wikimedia.org/w/index.php?curid=4454259>

### REFERENCES

1. Bardhan et al. Epidermolysis bullosa. *Nat Rev Dis Primers* 6, 78 (2020). doi: 10.1038/s41572-020-0210-0
2. Has et al. Consensus reclassification of inherited epidermolysis bullosa and other disorders with skin fragility. *Br J Dermatol.* 2020 Oct;183(4):614-627. doi: 10.1111/bjd.18921
3. Dures et al. The psychosocial impact of epidermolysis bullosa. *Qual Health Res.* 2011 Jun;21(6):771-82. doi: 10.1177/1049732311400431
4. Sangha et al. Psychosocial impact of epidermolysis bullosa on patients: A qualitative study. *Pediatr Dermatol.* 2021 Jul;38(4):819-824. doi: 10.1111/pde.14656.
5. Tabolli et al. Quality of life in patients with epidermolysis bullosa. *Br J Dermatol.* 2009 Oct;161(4):869-77. doi: 10.1111/j.1365-2133.2009.09306.x.
6. Martin et al. Psychosocial recommendations for the care of children and adults with epidermolysis bullosa and their family: evidence based guidelines. *Orphanet J Rare Dis.* 2019 Jun 11;14(1):133. doi: 10.1186/s13023-019-1086-5.
7. Haller et al. Reducing anxiety and preventing trauma in pediatric epidermolysis bullosa. *Pediatr Dermatol.* 2022 May;39(3):497-501. doi: 10.1111/pde.14951.
8. Retrosi et al. Multidisciplinary care for patients with epidermolysis bullosa from birth to adolescence: experience of one Italian reference center. *Ital J Pediatr.* 2022 Apr 12;48(1):58. doi: 10.1186/s13052-022-01252-3.
9. Tang et al. A systematic literature review of the disease burden in patients with recessive dystrophic epidermolysis bullosa. *Orphanet J Rare Dis.* 2021 Apr 13;16(1):175. doi: 10.1186/s13023-021-01811-7.
10. Nuño-Solinis, et al. Panorama de las iniciativas de educación para el autocuidado en España [Panorama of self-management initiatives in Spain]. *Gac Sanit.* 2013. 27(4):332-337.

### AIMS

Here, we present the first case report on protective factors and challenges for psycho-social maturation and resilience, and as the second (see Sciforum-063422) of a current international project that searches for reference models for children and young people with EB and the creation of a guidebook with different life stories of strategies and skills proven to help achieve academic/professional success despite EB's condition..

### METHODS

**Participants:** Inclusion criteria was to be a patient with EB according to the consensus reclassification of EB [2], the will to participate, to be an adult or minor with informed consent from parents to be interviewed and to use the written and image material for scientific purposes and divulgation. Exclusion criteria was to be unable to be contacted or interviewed or to sign informed consent for the above issues.

**Data recording:** After informed consent, the participant was interviewed by two clinical researchers in Medical Psychology and Psychiatry from the Universitat Autònoma de Barcelona.

**Data analysis:** The transcript of the semistructured qualitative and phenomenological interview was assessed using qualitative content analysis.

### RESULTS

After considering several candidates according to the inclusion/exclusion criteria, one adult (woman) with Recessive dystrophic epidermolysis bullosa (RDEB), the most severe form of EB [8] from DEBRA Mexico Monterrey, Mexico was contacted. This second participant to be involved in the project was Karen Puga Rivera. Several idiosyncratic characteristics made her eligible as the first case report for protective factors and challenges for psycho-social maturation and resilience. As in the previous case report (see Sciforum-063422) she can be considered an expert patient, as in terms of health education in chronic diseases, an expert patient can be defined as the one that is motivated, knows, searches and accepts help to care him/herself and is confident to be able to do it [10]. She also presents RDEB involving the most complex clinical and psycho-social scenario. She played the role of expert patient as a member of Debra Mexico Monterrey with peers and schoolers. In the present work, several social dimensions/ages affected in EB and their impact on self-esteem were explored. The semistructured interview depicted several life events and experiences related to her psycho-social maturation that the patient identified as the most negative or positive. The most severe obstacles were experienced during childhood in the scholar scenario. However, some of those classmates later became friendly adults, providing evidence of the temporality of some adverse life events and the relevance of maturation and resilience processes, both of herself and her counterparts. Her parents' professional profiles (nurses) and the essential role of her sister were described as foundational stones of well-being and self-esteem. Multidimensional understanding of affective relationships and sexuality and positive engagement in professional activities illustrated the development of positive dimensions of her adulthood despite the complexity of psycho-social factors in EB.

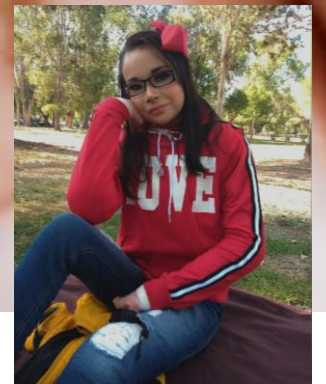

[https://www.facebook.com/](https://www.facebook.com/Juntos-con-Karen-Piel-de-Mariposa-109786978504470)

Juntos-con-Karen-Piel-de-Mariposa-109786978504470

(Images use restricted to this scientific research work)
